# Supplementary material for: The Excess Costs of Depression and the Influence of Sociodemographic and Socioeconomic Factors: Results from the German Health Interview and Examination Survey for Adults (DEGS)
Source: PubMed Central journal article supplement — Pharmacoeconomics. 2021 Feb 1;39(6):667–80. doi: 10.1007/s40273-021-01000-1 (PMC8166710; doi:10.1007/s40273-021-01000-1), 2021-02-01
Supplement: 40273_2021_1000_MOESM1_ESM.pdf [file 40273_2021_1000_MOESM1_ESM.pdf]

## Supplement

### S1: Unit costs

| Cost category                          | Unit        | Price per unit (2011) |
|----------------------------------------|-------------|-----------------------|
| <b>Direct costs</b>                    |             |                       |
| General practitioner                   | Per contact | € 20.06               |
| Internist                              | Per contact | € 65.44               |
| Gynaecologist                          | Per contact | € 30.13               |
| Ophthalmologist                        | Per contact | € 34.78               |
| Orthopaedist                           | Per contact | € 25.42               |
| Otolaryngologist                       | Per contact | € 26.40               |
| Psychiatrist/ Neurologist              | Per contact | € 44.72               |
| Psychologist/ Psychotherapist          | Per contact | € 78.08               |
| Surgeon                                | Per contact | € 43.39               |
| Dermatologist                          | Per contact | € 18.89               |
| Urologist                              | Per contact | € 24.70               |
| Paediatrician                          | Per contact | € 34.34               |
| Radiologist                            | Per contact | € 80.59 <sup>1</sup>  |
| Anaesthetist                           | Per contact | € 56.04 <sup>1</sup>  |
| Dentist                                | Per contact | € 55.87               |
| Other physicians                       | Per contact | € 40.06 <sup>2</sup>  |
| Outpatient clinic                      | Per contact | € 40.06 <sup>2</sup>  |
| Speech-language pathologist            | Per contact | € 38.59               |
| Occupational therapist                 | Per contact | € 37.51               |
| Physiotherapy, manual therapy, massage | Per contact | € 16.42               |
| Other medical specialists              | Per contact | € 19.98 <sup>2</sup>  |
| Outpatient rehabilitation              | Per day     | € 46.68               |
| Inpatient rehabilitation               | Per day     | € 121.85              |
| Hospital                               | Per day     | € 593.04              |
| <b>Indirect costs</b>                  |             |                       |
| Average wage rate                      | Per hour    | € 27.88               |

Sources: Direct costs, if not otherwise specified: Bock et al 2015; indirect costs: Statistisches Bundesamt 2012, 2014.

<sup>1</sup> internal database

<sup>2</sup> arithmetic mean of all other unit costs within the same cost category

## S2: Health care service utilization items from the DEGS questionnaire

### Impressum

**Herausgeber:** Robert Koch-Institut, Postfach 65 02 61, 13302 Berlin

Das Robert Koch-Institut ist ein Bundesinstitut im Geschäftsbereich des Bundesministeriums für Gesundheit.

**Gestaltung und Satz:** da vinci design GmbH, Albrechtstraße 13, 10117 Berlin

**Fotonachweis:** Elena Elisseeva

**Druck:** Robert Koch-Institut

© Berlin 2008

Nachdruck, auch auszugsweise, nur mit schriftlicher Genehmigung des Herausgebers.

## Healthcare services you have used

**7** When was the last time you went to see a doctor (not a dentist) or made use of his/her staff's services?

During the last 4 weeks.....

Between 1 and 3 months ago .....

Between 4 and 12 months ago .....

Between 12 months and 5 years ago.....

More than 5 years ago .....

**8** Do you have a family doctor you consult first when you have a health problem?

Yes.....

No .....

**9** Please state how many times in the last 12 months you have seen a doctor practising in the following fields.  
Please include house calls.

|                                                                    | Yes                   | Number of times                           |
|--------------------------------------------------------------------|-----------------------|-------------------------------------------|
| General practitioner .....                                         | <input type="radio"/> | <input type="text"/> <input type="text"/> |
| Internist (e. g. cardiologist, pneumologist, diabetologist) .....  | <input type="radio"/> | <input type="text"/> <input type="text"/> |
| Gynaecologist .....                                                | <input type="radio"/> | <input type="text"/> <input type="text"/> |
| Eye specialist (Ophthalmologist) .....                             | <input type="radio"/> | <input type="text"/> <input type="text"/> |
| Orthopaedist .....                                                 | <input type="radio"/> | <input type="text"/> <input type="text"/> |
| Ear-nose-throat specialist .....                                   | <input type="radio"/> | <input type="text"/> <input type="text"/> |
| Psychiatrist, neurologist.....                                     | <input type="radio"/> | <input type="text"/> <input type="text"/> |
| Practising psychotherapist.....                                    | <input type="radio"/> | <input type="text"/> <input type="text"/> |
| Surgeon .....                                                      | <input type="radio"/> | <input type="text"/> <input type="text"/> |
| Dermatologist.....                                                 | <input type="radio"/> | <input type="text"/> <input type="text"/> |
| Radiologist.....                                                   | <input type="radio"/> | <input type="text"/> <input type="text"/> |
| Urologist.....                                                     | <input type="radio"/> | <input type="text"/> <input type="text"/> |
| Other specialist, .....                                            | <input type="radio"/> | <input type="text"/> <input type="text"/> |
| please specify (not including therapists):<br><input type="text"/> |                       |                                           |
| Dentist, orthodontist.....                                         | <input type="radio"/> | <input type="text"/> <input type="text"/> |
| <b>I have not seen a doctor in the last 12 months.</b> .....       | <input type="radio"/> |                                           |

## Healthcare services you have used

**10** Have you been to a hospital emergency or outpatients department or a medical treatment centre in the last 12 months?  
Not including overnight stays.

Yes .....       No .....       ➔ Please proceed to question 11

↓

If yes, how many times?

**11** Have you received medical advice about your health in the last 12 months?

Yes .....       No .....       ➔ Please proceed to question 12

↓

**If yes, was it about...**  
You can cross as many boxes as you wish.

- ...your eating habits? .....
- ...your weight? .....
- ...your sporting activities? .....
- ...your smoking? .....
- ...your immunisations? .....
- ...your alcohol intake? .....
- ...coping with stress? .....
- ...your dental hygiene? .....
- ...your general personal circumstances? .....
- ...your career situation? .....
- ...your use of drugs? .....
- ...your sex habits? .....
- ...something else? .....

Please specify:

## Healthcare services you have used

**12** Which of the following kinds of therapists (excluding psychotherapists) have you seen in the last 12 months and how many times?

|                                                                          | Yes                   | Number of times                                                                                                 |
|--------------------------------------------------------------------------|-----------------------|-----------------------------------------------------------------------------------------------------------------|
| Alternative medicine practitioner .....                                  | <input type="radio"/> | <input style="width: 20px; height: 20px;" type="text"/> <input style="width: 20px; height: 20px;" type="text"/> |
| Physiotherapist.....                                                     | <input type="radio"/> | <input style="width: 20px; height: 20px;" type="text"/> <input style="width: 20px; height: 20px;" type="text"/> |
| Other.....                                                               | <input type="radio"/> | <input style="width: 20px; height: 20px;" type="text"/> <input style="width: 20px; height: 20px;" type="text"/> |
| Please specify: <input style="width: 450px; height: 20px;" type="text"/> |                       |                                                                                                                 |
| I have not seen a therapist in the last 12 months. ....                  |                       | <input type="radio"/>                                                                                           |

**13** How many days altogether in the last 12 months have you been so ill that you have not been able to get on with your normal life?

Please include any days spent in hospital.

Approx. ....    days

None .....

**14** If you are employed, how many working days in the last 12 months have you been officially off work sick?

Please include any days spent in hospital.

Approx. ....    working days

None .....

Not applicable .....

## Healthcare services you have used

**15** How many nights in the last 12 months have you spent as an inpatient in hospital?

Approx. ....    nights

None .....

**16** Have you had any rehabilitation treatment (as an in- or outpatient) in the last 3 years?  
This refers to rehabilitation measures and follow-up treatments approved by your health, pension or accident insurance.

Yes .....       No .....  ➔ Please proceed to question 17

⬇

If yes, when was the last time (year)?

⬇

Were you treated as an:

Outpatient ("day clinic") .....

Inpatient .....

### S3: Overview of excluded observations

| <b>Reasons for excluding observations</b>                                                 | <b>Amount of excluded observations</b> |
|-------------------------------------------------------------------------------------------|----------------------------------------|
| Missing values in the diagnosis of depression                                             | n=97                                   |
| Observations with depressive symptoms in the control group                                | n=822                                  |
| Missing values in the costs (utilization of health care services and productivity losses) | n=1740                                 |
| Missing values in the social subgroups                                                    | n=183                                  |
| Missing values in the covariates for the group adjustment                                 | n=546                                  |

**S4: Estimated median annual costs of individuals with medically diagnosed depression (12-month prevalence) compared to individuals without medically diagnosed depression (in Euro, 2019)**

| Cost category                    | Depression (N=223) |                | Control (N=223) |               |
|----------------------------------|--------------------|----------------|-----------------|---------------|
|                                  | Median             | IQR            | Median          | IQR           |
| <b>Total costs</b>               | <b>2800.3</b>      | <b>12165.0</b> | <b>1322.3</b>   | <b>3335.1</b> |
| <b>Direct costs</b>              | <b>1608.3</b>      | <b>3697.0</b>  | <b>732.3</b>    | <b>1491.9</b> |
| Outpatient costs                 | 661.9              | 1036.3         | 381.0           | 478.4         |
| <i>Physicians</i>                | <i>549.1</i>       | <i>791.7</i>   | <i>322.8</i>    | <i>367.8</i>  |
| <i>Psychiatrist/Neurologist</i>  | <i>0</i>           | <i>148.3</i>   | <i>0</i>        | <i>0</i>      |
| <i>Psychotherapist</i>           | <i>0</i>           | <i>259.0</i>   | <i>0</i>        | <i>0</i>      |
| <i>General practitioner</i>      | <i>88.7</i>        | <i>88.7</i>    | <i>66.5</i>     | <i>88.7</i>   |
| <i>Other physicians</i>          | <i>249.5</i>       | <i>304.1</i>   | <i>238.1</i>    | <i>295.6</i>  |
| <i>Non-physicians</i>            | <i>0</i>           | <i>108.9</i>   | <i>0</i>        | <i>88.4</i>   |
| <i>Outpatient clinic</i>         | <i>0</i>           | <i>0</i>       | <i>0</i>        | <i>0</i>      |
| <i>Outpatient rehabilitation</i> | <i>0</i>           | <i>0</i>       | <i>0</i>        | <i>0</i>      |
| Inpatient costs                  | 0                  | 0              | 0               | 0             |
| <i>Hospital</i>                  | <i>0</i>           | <i>0</i>       | <i>0</i>        | <i>0</i>      |
| <i>Inpatient rehabilitation</i>  | <i>0</i>           | <i>0</i>       | <i>0</i>        | <i>0</i>      |
| Medication costs                 | 342.0              | 673.6          | 178.0           | 523.0         |
| <b>Indirect costs</b>            | <b>0</b>           | <b>3698.9</b>  | <b>0</b>        | <b>1331.6</b> |
| Early retirement                 | 0                  | 0              | 0               | 0             |
| Sick leave                       | 0                  | 1233.0         | 0               | 863.1         |

n=4540 observations in the control group were down weighted in order to match the group of individuals with depression.

**S5: Sociodemographic determinants of annual excess costs of individuals with medically diagnosed depression (12-month prevalence) compared to individuals without medically diagnosed depression (in Euro, 2019)**

| Sociodemographic determinants                      | Sample size <sup>1</sup> | Depression   | Control     | Excess costs                 |         |                                           |
|----------------------------------------------------|--------------------------|--------------|-------------|------------------------------|---------|-------------------------------------------|
|                                                    |                          | Mean (SE)    | Mean (SE)   | Absolute Difference [95%-CI] | p-value | Relative Difference <sup>2</sup> [95%-CI] |
| <b>Total costs</b>                                 |                          |              |             |                              |         |                                           |
| <b>Sex</b>                                         |                          |              |             |                              |         |                                           |
| Male                                               | 71                       | 8392 (1443)  | 5758 (921)  | 2635 [-720 - 5990]           | 0.124   | 1.5 [0.9 - 2.3]                           |
| Female                                             | 152                      | 10074 (1116) | 3907 (294)  | 6167 [3904 - 8429]           | <0.001  | 2.6 [2.0 - 3.4]                           |
| <b>Age (by age group)</b>                          |                          |              |             |                              |         |                                           |
| 18-29                                              | 24                       | 9770 (3098)  | 1815 (214)  | 7955 [1868 - 14042]          | 0.010   | 5.4 [2.8 - 10.4]                          |
| 30-44                                              | 34                       | 13213 (3308) | 3654 (698)  | 9560 [2933 - 16187]          | 0.005   | 3.6 [2.0 - 6.7]                           |
| 45-64                                              | 122                      | 9790 (1084)  | 5857 (513)  | 3932 [1582 - 6282]           | 0.001   | 1.7 [1.3 - 2.2]                           |
| 65+                                                | 43                       | 5791 (1209)  | 3624 (516)  | 2168 [-408 - 4743]           | 0.099   | 1.6 [1.0 - 2.6]                           |
| <b>Partner</b>                                     |                          |              |             |                              |         |                                           |
| No                                                 | 69                       | 9509 (1409)  | 4978 (810)  | 4530 [1346 - 7715]           | 0.005   | 1.9 [1.2 - 2.9]                           |
| Yes                                                | 154                      | 9552 (1124)  | 4414 (332)  | 5138 [2841 - 7436]           | <0.001  | 2.2 [1.6 - 2.8]                           |
| <b>Socioeconomic status</b>                        |                          |              |             |                              |         |                                           |
| Low                                                | 43                       | 8673 (1527)  | 3278 (478)  | 5395 [2259 - 8530]           | 0.001   | 2.6 [1.7 - 4.1]                           |
| Medium                                             | 137                      | 10179 (1223) | 5025 (443)  | 5154 [2605 - 7703]           | <0.001  | 2.0 [1.5 - 2.7]                           |
| High                                               | 43                       | 8365 (1933)  | 3717 (478)  | 4648 [745 - 8550]            | 0.020   | 2.3 [1.3 - 3.8]                           |
| <b>Social Support</b>                              |                          |              |             |                              |         |                                           |
| Low                                                | 48                       | 13608 (2430) | 8454 (3492) | 5154 [-3184 - 13492]         | 0.226   | 1.6 [0.7 - 3.9]                           |
| Moderate/High                                      | 175                      | 8422 (900)   | 4193 (252)  | 4230 [2397 - 6062]           | <0.001  | 2.0 [1.6 - 2.6]                           |
| <b>First-generation/second-generation migrants</b> |                          |              |             |                              |         |                                           |
| No                                                 | 181                      | 10447 (1044) | 4719 (367)  | 5729 [3559 - 7899]           | <0.001  | 2.2 [1.7 - 2.8]                           |
| Yes                                                | 42                       | 5622 (1277)  | 3801 (1007) | 1820 [-1367 - 5008]          | 0.263   | 1.5 [0.7 - 2.9]                           |
| <b>Direct costs</b>                                |                          |              |             |                              |         |                                           |
| <b>Sex</b>                                         |                          |              |             |                              |         |                                           |
| Male                                               | 71                       | 3978 (925)   | 2426 (311)  | 1552 [-360 - 3464]           | 0.112   | 1.6 [1.0 - 2.8]                           |
| Female                                             | 152                      | 4641 (694)   | 2022 (156)  | 2619 [1225 - 4012]           | <0.001  | 2.3 [1.7 - 3.2]                           |
| <b>Age (by age group)</b>                          |                          |              |             |                              |         |                                           |
| 18-29                                              | 24                       | 4968 (1917)  | 1032 (144)  | 3936 [169 - 7704]            | 0.041   | 4.8 [2.2 - 10.8]                          |
| 30-44                                              | 34                       | 6128 (2187)  | 1309 (214)  | 4819 [512 - 9126]            | 0.028   | 4.7 [2.2 - 10.1]                          |
| 45-64                                              | 122                      | 3404 (569)   | 2162 (220)  | 1242 [47 - 2437]             | 0.042   | 1.6 [1.1 - 2.3]                           |
| 65+                                                | 43                       | 5697 (1208)  | 3598 (516)  | 2099 [-475 - 4674]           | 0.110   | 1.6 [1.0 - 2.6]                           |
| <b>Partner</b>                                     |                          |              |             |                              |         |                                           |

|                                             |                          | Depression  | Control     | Excess costs                 |         |                                           |
|---------------------------------------------|--------------------------|-------------|-------------|------------------------------|---------|-------------------------------------------|
| Sociodemographic determinants               | Sample size <sup>1</sup> | Mean (SE)   | Mean (SE)   | Absolute Difference [95%-CI] | p-value | Relative Difference <sup>2</sup> [95%-CI] |
| No                                          | 69                       | 4827 (976)  | 2159 (290)  | 2667 [673 - 4662]            | 0.009   | 2.2 [1.4 - 3.6]                           |
| Yes                                         | 154                      | 4252 (678)  | 2117 (164)  | 2135 [767 - 3503]            | 0.002   | 2.0 [1.4 - 2.8]                           |
| Socioeconomic status                        |                          |             |             |                              |         |                                           |
| Low                                         | 43                       | 4711 (1086) | 1586 (195)  | 3126 [964 - 5288]            | 0.005   | 3.0 [1.8 - 5.0]                           |
| Medium                                      | 137                      | 4403 (731)  | 2360 (218)  | 2043 [548 - 3538]            | 0.007   | 1.9 [1.3 - 2.7]                           |
| High                                        | 43                       | 4236 (1324) | 2203 (299)  | 2033 [-626 - 4693]           | 0.134   | 1.9 [1.0 - 3.7]                           |
| Social Support                              |                          |             |             |                              |         |                                           |
| Low                                         | 48                       | 5803 (1582) | 3787 (1498) | 2015 [-2255 - 6286]          | 0.355   | 1.5 [0.6 - 3.9]                           |
| Moderate/High                               | 175                      | 4054 (559)  | 2099 (128)  | 1954 [830 - 3079]            | 0.001   | 1.9 [1.4 - 2.6]                           |
| First-generation/second-generation migrants |                          |             |             |                              |         |                                           |
| No                                          | 181                      | 4659 (658)  | 2229 (160)  | 2430 [1104 - 3757]           | <0.001  | 2.1 [1.5 - 2.9]                           |
| Yes                                         | 42                       | 3441 (833)  | 2268 (750)  | 1174 [-1023 - 3370]          | 0.295   | 1.5 [0.7 - 3.4]                           |
| Indirect costs                              |                          |             |             |                              |         |                                           |
| Sex                                         |                          |             |             |                              |         |                                           |
| Male                                        | 71                       | 4415 (1062) | 3332 (660)  | 1083 [-1368 - 3533]          | 0.387   | 1.3 [0.7 - 2.4]                           |
| Female                                      | 152                      | 5433 (757)  | 1885 (197)  | 3548 [2014 - 5082]           | <0.001  | 2.9 [2.0 - 4.1]                           |
| Age (by age group)                          |                          |             |             |                              |         |                                           |
| 18-29                                       | 24                       | 4802 (2168) | 783 (114)   | 4019 [-235 - 8273]           | 0.064   | 6.1 [2.4 - 15.5]                          |
| 30-44                                       | 34                       | 7085 (1716) | 2345 (544)  | 4741 [1211 - 8270]           | 0.008   | 3.0 [1.6 - 5.8]                           |
| 45-64                                       | 122                      | 6385 (877)  | 3695 (370)  | 2690 [824 - 4556]            | 0.005   | 1.7 [1.2 - 2.4]                           |
| 65+                                         | 43                       | 94 (79)     | 26 (14)     | 68 [-89 - 226]               | 0.393   | 3.7 [0.5 - 25.8]                          |
| Partner                                     |                          |             |             |                              |         |                                           |
| No                                          | 69                       | 4682 (1110) | 2819 (648)  | 1863 [-656 - 4382]           | 0.147   | 1.7 [0.9 - 3.2]                           |
| Yes                                         | 154                      | 5300 (743)  | 2296 (205)  | 3003 [1492 - 4515]           | <0.001  | 2.3 [1.7 - 3.2]                           |
| Socioeconomic status                        |                          |             |             |                              |         |                                           |
| Low                                         | 43                       | 3962 (1221) | 1693 (377)  | 2269 [-235 - 4773]           | 0.076   | 2.3 [1.1 - 4.9]                           |
| Medium                                      | 137                      | 5776 (826)  | 2665 (294)  | 3111 [1393 - 4829]           | <0.001  | 2.2 [1.5 - 3.1]                           |
| High                                        | 43                       | 4129 (1331) | 1515 (407)  | 2614 [-114 - 5343]           | 0.060   | 2.7 [1.2 - 6.2]                           |
| Social Support                              |                          |             |             |                              |         |                                           |
| Low                                         | 48                       | 7805 (1393) | 4666 (2075) | 3139 [-1760 - 8037]          | 0.209   | 1.7 [0.7 - 4.3]                           |
| Moderate/High                               | 175                      | 4369 (678)  | 2093 (183)  | 2276 [899 - 3652]            | 0.001   | 2.1 [1.5 - 3.0]                           |
| First-generation/second-generation migrants |                          |             |             |                              |         |                                           |
| No                                          | 181                      | 5788 (727)  | 2490 (255)  | 3298 [1789 - 4808]           | <0.001  | 2.3 [1.7 - 3.2]                           |
| Yes                                         | 42                       | 2180 (838)  | 1534 (479)  | 647 [-1246 - 2539]           | 0.503   | 1.4 [0.5 - 3.8]                           |

SE – robust standard error

95%-CI – 95% confidence Intervals

<sup>1</sup> Observations in the control group were down weighted in order to match the group of individuals with depression.

<sup>2</sup> Exponentiated coefficients and corresponding confidence intervals.

Weighted covariates using entropy balancing: Age<sup>3</sup>, sex<sup>4</sup>, marital status<sup>5</sup>, income<sup>6</sup>, community size, physicians density, recognized disability, body mass index, contraceptive pill use, smoker status, use of vision aids, arthrosis/degenerative joint disease, cancer, chronic inflammatory bowel disease, diabetes, epilepsy, gastroduodenal ulcer, hypertension, joint pain, migraine, thyroid disease, not specified other diseases.

<sup>3</sup>The covariate “sex” was removed from the sex subgroups.

<sup>4</sup>The covariate “age” was removed from the age subgroups.

<sup>5</sup>The covariate “marital status” was removed from the partnership subgroups.

<sup>6</sup>The covariate “income” was removed from the SES subgroups.

## S6: Sensitivity analyses

Annual excess costs of individuals with diagnosed depression (12-month prevalence) compared to individuals without depression (in Euro, 2019):

Model 1): Different assessment of indirect costs: Productivity was stratified by full time/part time or marginal part-time work and by age, gender and education (instead of total average).

Model 2): Unweighted analysis: Without balancing differences between depression and control group in social and clinical covariates.

Annual excess costs of individuals with depressive symptoms (PHQ-9  $\geq 10$ ) compared to individuals without current depressive symptoms (in Euro, 2019):

Model 3): Weighted using entropy balancing with the covariates from the main analysis (in reprocessed dataset).

Model 4): Weighted using entropy balancing with new covariates (in reprocessed dataset; same selection process as before, resulting in inclusion of the following covariates in the balancing scheme: *Age, sex, education, income, marital status, community size, region, physicians density, recognized disability, body mass index, contraceptive pill use, use of hearing aids, physical activity, smoker status, use of vision aids, arthrosis/degenerative joint disease, bladder weakness, cancer, chronic inflammatory bowel disease, diabetes, epilepsy, hepatic cirrhosis, hepatitis, hypertension, injury/poisoning, joint pain, kidney failure, migraine, prostate hyperplasia, rheumatoid arthritis, thyroid disease, not specified other diseases.*

Model 5): Unweighted analysis (in reprocessed dataset).

Absolute difference in means

| Dataset:                  | Dataset from main analysis       |                       |                       | Reprocessed datasets            |                       |                       |
|---------------------------|----------------------------------|-----------------------|-----------------------|---------------------------------|-----------------------|-----------------------|
| Depression identifier:    | Depression (12-month-prevalence) |                       |                       | Depressive symptoms (PHQ-9 ≥10) |                       |                       |
| Cost category             | Main analysis                    | Model 1) <sup>1</sup> | Model 2) <sup>2</sup> | Model 3) <sup>3</sup>           | Model 4) <sup>4</sup> | Model 5) <sup>5</sup> |
| Total costs               | 5047***                          | 4750***               | 6850***               | 3750***                         | 3594***               | 4902***               |
| Direct costs              | 2212***                          | 2212***               | 3043***               | 1978***                         | 1944***               | 2483***               |
| Outpatient costs          | 498***                           | 498***                | 651***                | 335***                          | 327***                | 440***                |
| Physicians                | 465***                           | 465***                | 579***                | 271***                          | 267***                | 350***                |
| Psychiatrist/Neurologist  | 103***                           | 103***                | 107***                | 43***                           | 40***                 | 46***                 |
| Psychotherapist           | 317***                           | 317***                | 322***                | 151***                          | 151***                | 157***                |
| General practitioner      | 30***                            | 30***                 | 49***                 | 33**                            | 32***                 | 52***                 |
| Other physicians          | 16                               | 16                    | 100***                | 44*                             | 45*                   | 96***                 |
| Non-physicians            | 32                               | 32                    | 63***                 | 5                               | 1                     | 23*                   |
| Outpatient clinic         | 8                                | 8                     | 14                    | 60                              | 59                    | 64                    |
| Outpatient rehabilitation | -8                               | -8                    | -5                    | -1                              | -0                    | 3                     |
| Inpatient costs           | 1345**                           | 1345**                | 1804***               | 1327*                           | 1292*                 | 1619**                |
| Hospital                  | 1285**                           | 1285**                | 1650***               | 1276*                           | 1245*                 | 1509**                |
| Inpatient rehabilitation  | 59                               | 59                    | 154*                  | 51                              | 48                    | 110*                  |
| Medication costs          | 370                              | 370                   | 589                   | 316                             | 325                   | 424                   |
| Indirect costs            | 2835***                          | 2538***               | 3807***               | 1772***                         | 1650***               | 2418***               |
| Early retirement          | 1686***                          | 1517**                | 2252***               | 1077**                          | 1008**                | 1334***               |
| Sick leave                | 1149*                            | 1021*                 | 1555***               | 695*                            | 642                   | 1084***               |

Significance level: \* for p<.05, \*\* for p<.01, and \*\*\* for p<.001

<sup>1</sup> Model 1): Different assessment of indirect costs: Productivity was stratified by full time/part time or marginal part-time work and by age, gender and education (instead of total average).

<sup>2</sup> Model 2): Unweighted analysis: Without balancing differences between depression and control group in social and clinical covariates.

<sup>3</sup> Model 3): Depression identifier: PHQ-9 ≥10. Weighted analysis using entropy balancing with the covariates from the main analysis.

<sup>4</sup> Model 4): Depression identifier: PHQ-9 ≥10. Weighted analysis using entropy balancing with newly selected covariates.

<sup>5</sup> Model 5): Depression identifier: PHQ-9 ≥10. Unweighted analysis.

Relative difference in means

| Dataset:                  | Dataset from main analysis       |                       |                       | Reprocessed datasets                   |                       |                       |
|---------------------------|----------------------------------|-----------------------|-----------------------|----------------------------------------|-----------------------|-----------------------|
| Depression identifier:    | Depression (12-month-prevalence) |                       |                       | Depressive symptoms (PHQ-9 $\geq 10$ ) |                       |                       |
| Cost category             | Main analysis                    | Model 1) <sup>1</sup> | Model 2) <sup>2</sup> | Model 3) <sup>3</sup>                  | Model 4) <sup>4</sup> | Model 5) <sup>5</sup> |
| Total costs               | 2.1***                           | 2.1***                | 3.5***                | 2***                                   | 1.9***                | 2.8***                |
| Direct costs              | 2***                             | 2***                  | 3.2***                | 2***                                   | 2***                  | 2.8***                |
| Outpatient costs          | 1.9***                           | 1.9***                | 2.6***                | 1.7***                                 | 1.6***                | 2.1***                |
| Physicians                | 2.1***                           | 2.1***                | 2.8***                | 1.7***                                 | 1.7***                | 2.1***                |
| Psychiatrist/Neurologist  | 11.2***                          | 11.2***               | 22.4***               | 6.4***                                 | 5.4***                | 10.2***               |
| Psychotherapist           | 16.1***                          | 16.1***               | 21.1***               | 7.9***                                 | 7.8***                | 10.8***               |
| General practitioner      | 1.3***                           | 1.3***                | 1.8***                | 1.4**                                  | 1.4***                | 1.8***                |
| Other physicians          | 1                                | 1                     | 1.4***                | 1.2*                                   | 1.2*                  | 1.4***                |
| Non-physicians            | 1.4                              | 1.4                   | 2.3***                | 1.1                                    | 1                     | 1.5*                  |
| Outpatient clinic         | 1.4                              | 1.4                   | 2.2                   | 4.8                                    | 4.4                   | 6.3                   |
| Outpatient rehabilitation | 0.5                              | 0.5                   | 0.6                   | 0.9                                    | 1                     | 1.3                   |
| Inpatient costs           | 2.2**                            | 2.2**                 | 3.7***                | 2.4*                                   | 2.4*                  | 3.5**                 |
| Hospital                  | 2.3**                            | 2.3**                 | 3.8***                | 2.5*                                   | 2.6*                  | 3.5**                 |
| Inpatient rehabilitation  | 1.4                              | 1.4                   | 3.4*                  | 1.4                                    | 1.4                   | 2.7*                  |
| Medication costs          | 1.7                              | 1.7                   | 2.8                   | 1.7                                    | 1.8                   | 2.3                   |
| Indirect costs            | 2.2***                           | 2.1***                | 3.9***                | 1.9***                                 | 1.8***                | 2.9***                |
| Early retirement          | 2.8***                           | 2.6**                 | 7.5***                | 2.8**                                  | 2.6**                 | 4.9***                |
| Sick leave                | 1.8*                             | 1.8*                  | 2.6***                | 1.5*                                   | 1.5                   | 2.1***                |

Significance level: \* for  $p < .05$ , \*\* for  $p < .01$ , and \*\*\* for  $p < .001$

<sup>1</sup> Model 1): Different assessment of indirect costs: Productivity was stratified by full time/part time or marginal part-time work and by age, gender and education (instead of total average).

<sup>2</sup> Model 2): Unweighted analysis: Without balancing differences between depression and control group in social and clinical covariates.

<sup>3</sup> Model 3): Depression identifier: PHQ-9  $\geq 10$ . Weighted analysis using entropy balancing with the covariates from the main analysis.

<sup>4</sup> Model 4): Depression identifier: PHQ-9  $\geq 10$ . Weighted analysis using entropy balancing with newly selected covariates.

<sup>5</sup> Model 5): Depression identifier: PHQ-9  $\geq 10$ . Unweighted analysis.
